## Cardiac Magnetic Resonance as a diagnostic tool in arrhythmias

Caldeira Da Rocha R.; Picarra B.; Pais J.; Santos AR.; Carrington M.; Dias Claudio F.; Fernandes R.; Trinca M.

Hospital Espirito Santo de Evora, Cardiology, Evora, Portugal

**Funding Acknowledgements:** Type of funding sources: None.

**Introduction:** Etiology of cardiac arrhythmias is often difficult to determine. As the gold standard to anatomical and functional cardiac evaluation, Cardiac Magnetic Resonance (CMR) can be a fundamental technique for accurate assessment of myocardial arrhythmic substrates or for arrhythmias management.

**Purpose:** The aim of this study is to determine diagnostic and arrhythmic risk stratification impact of CMR performed in patients with suspected or confirmed arrhythmias.

**Methods:** We performed a six-years prospective study of patients with suspected or confirmed arrhythmias which evaluation with other techniques did not provide a definitive diagnosis. These patients underwent CMR for diagnostic and risk stratification assessment. We applied a protocol to evaluate both ventricles' morphology and functional and late gadolinium enhancement (LGE) presence.

**Results:** A total of 93 patients were included, of which 66% were male, with a mean age of  $45 \pm 17$  years old. The indications for patients with suspected or confirmed arrhythmias performing CMR evaluation were the following: 33% ( $n = 31$ ) of the patients had very frequent premature ventricular complexes, 23% ( $n = 21$ ) had sustained ventricular tachycardia (VT), 5% ( $n = 5$ ) non-sustained VT, 17% ( $n = 16$ ) suspected structural heart disease with high arrhythmic potential, 10% ( $n = 9$ ) unexplained recurrent syncope, 9% ( $n = 8$ ) supraventricular tachycardia and 3% ( $n = 3$ ) aborted sudden cardiac death. Depressed ejection fraction (EF) ( $< 50\%$ ) was present in 10% ( $n = 9$ ) for LV (mean EF  $38 \pm 9\%$ ) and 15% ( $n = 14$ ) for RV (mean EF  $42 \pm 7\%$ ). Dilation of LV was found in 25% of patients ( $n = 23$ , mean LV volume:  $115 \pm 7 \text{ ml/m}^2$ ), with RV dilation being present in only 1 patient, who had right ventricle arrhythmogenic dysplasia (RVAD) (RV volume:  $152 \text{ ml/m}^2$ ). In total, 16% had interventricular septum hypertrophy (mean  $15 \pm 4 \text{ mm/m}^2$ ). We found slight anterior leaflet prolapse of mitral valve in 10% ( $n = 9$ ) of the cases and mild mitral regurgitation in 15% ( $n = 14$ ). Left atrium dilation was observed in 17% ( $n = 16$ ) of patients (mean area of  $18 \pm 2 \text{ cm}^2/\text{m}^2$ ), as right atrium was dilated in only two. In 20% of the patients, CMR contributed to establish a previously unknown diagnosis: 6% ( $n = 5$ ) have hypertrophic cardiomyopathy, 4% ( $n = 4$ ) a myocarditis sequelae and 2% ( $n = 2$ ) had RVAD. LV non-compaction, a silent myocardial infarction scar and non-ischemic dilated cardiomyopathy were diagnosed in 3% of the cases each. In 15% ( $n = 14$ ) we found nonspecific variations, which deserve follow-up. On the remaining patients, CMR was considered normal.

**Conclusion:** As a high reproducible, accurate and versatile technique, CMR allowed an increase on diagnosis in 20% of the patients with suspected or confirmed arrhythmias. Consequently, it contributed to the risk stratification of our study population with suspected high arrhythmic potential when the first-line complementary exams were inconclusive.
